# Supplementary material
Source: publisher site journal article supplement (https://www.dovepress.com/get_supplementary_file.php?f=338914.docx)
Supplement: Supplementary file 1 [file get_supplementary_file.php]

Table S1. Etiological diagnosis of patients with nonreactive or reactive phenotype

| Phenotypes | Nonreactive  (n=51) | Reactive  (n=21) |
| --- | --- | --- |
| Viruses | CMV 18  RSV 5  Influenza C virus 2  Influenza A virus 2  Human Alphaherpesvirus 1 2  EBV 2  Adenovirus 1 | EBV 3  Adenovirus 2  Human coronavirus OC43 1 |
| Bacteria | Staphylococcus Pneumoniae 3 Stenotrophomonas Maltophilia 2  Moraxella catarrhalis 2  Enterococcus Faecalis 1  Acinetobacter Baumannii 1  Burkholderia pseudomallei 1  Haemophilus influenzae 1 | Pseudomonas Aeruginosa 4  Staphylococcus Aureus 2  Acinetobacter Baumannii 1  Burkholderia pseudomallei 1  Enterococcus Faecalis 1  Escherichia Coli 1  Klebsiella Pneumoniae 1  Staphylococcus Pneumoniae 1 |
| Fungal | Aspergillus Fumigatus 3  Pneumocystis Jiroveci 2  Rhizopus Oligosporus 1 | Pneumocystis Jiroveci 2 |
| Others | Chlamydia Psittaci 1  Mycoplasma Pneumoniae 1 | Legionella Pneumophila 1 |

*CMV*: Human Cytomegalovirus; *EBV*: Epstein-Barr Virus; *RSV*: Human Respiratory Syncytial Virus.

Table S2. Association of etiological pathogen and nonreactive phenotype

| Type of etiology | Pathogen | Phi coefficient  for nonreactive phenotype | Phi coefficient  for reactive phenotype | *P* |
| --- | --- | --- | --- | --- |
| Viruses | CMV  RSV  Influenza C virus  Influenza A virus  Human Alphaherpesvirus 1  EBV  Adenovirus  Human coronavirus OC43 | 0.370  0.175  0.108  0.108  0.108  -0.185  -0.172  -0.185 | -0.370  -0.175  -0.108  -0.108  -0.108  0.185  0.172  0.185 | 0.020  0.137  0.357  0.357  0.357  0.116  0.144  0.117 |
| Bacteria | Staphylococcus Pneumoniae Stenotrophomonas Maltophilia  Moraxella catarrhalis  Enterococcus Faecalis  Acinetobacter Baumannii  Burkholderia pseudomallei  Haemophilus influenzae  Pseudomonas Aeruginosa  Staphylococcus Aureus  Escherichia Coli  Klebsiella Pneumoniae | 0.022  0.108  0.108  -0.077  -0.077  -0.077  0.076  -0.379  -0.263  -0.185  -0.185 | -0.022  -0.108  -0.108  0.077  0.077  0.077  -0.076  0.379  0.263  0.185  0.185 | 0.850  0.357  0.357  0.511  0.511  0.511  0.518  0.001  0.025  0.117  0.117 |
| Fungal | Aspergillus Fumigatus  Pneumocystis Jiroveci  Rhizopus Oligosporus | 0.134  -0.111  0.076 | -0.134  0.111  -0.076 | 0.256  0.345  0.518 |
| Others | Chlamydia Psittaci  Mycoplasma Pneumoniae  Legionella Pneumophila | 0.076  0.076  -0.185 | -0.076  -0.076  0.185 | 0.518  0.518  0.117 |

*The Cramer’s V coefficient for various pathogens and phenotypes was 0.504, P<0.001*

*CMV*: Human Cytomegalovirus; *EBV*: Epstein-Barr Virus; *RSV*: Human Respiratory Syncytial Virus.

Figure S1. Alpha diversity and Beta diversity of lung microbiota for patients with reactive or nonreactive phenotype

1. Patients with reactive phenotype had a higher richness and evenness of species between samples (evaluated with Shannon Index).
2. The beta diversity was evaluated using Bray-Curtis Dissimilarity metric plotted in a principal coordinate analysis (PCoA), revealed an apparent pattern of clustering.
